# Supplementary material
Source: publisher figshare collection journal article supplement (https://acs.figshare.com/ndownloader/files/3984925)
Supplement: Supplementary file 1 [file 3984925]

## Sheet: Table S4
Supplemental Table S4. List of cellular location, molecular and cellular function, protein abundance and membrane proteins of GABA rho1 receptor interacting proteins from three distinct tandem MS methods
Gene	Cellular location	Membrane Protein	Molecular and Cellular Function	Molecular and Cellular Function Detail	ENSEMBL ID	Protein Abundance	Protein	IPI number	Method
ACTA1	Cytoplasm		Cellular organization	Cytoskeleton	ENSP00000355645	420.02	Actin, alpha skeletal muscle	IPI00021428	S
ACTB	Cytoplasm		Cellular organization	Cytoskeleton	ENSP00000349960	4670.6	Actin, cytoplasmic 1	IPI00021439	SG
ACTBL2	Cytoplasm		Cellular organization	Cytoskeleton	ENSP00000416706	203.842	Beta-actin-like protein 2	IPI00003269	G
AHNAK	Nucleus		Miscellaneous	Miscellaneous: Other	ENSP00000367263	15.7348	AHNAK nucleoprotein isoform 1	IPI00021812	M
ALDOA	Cytoplasm		Metabolism	Metabolic enzyme	ENSP00000336927	1181.62	Aldolase A, fructose-bisphosphate	IPI00465439	S
ANXA2	Plasma Membrane	YES	Miscellaneous	Miscellaneous: Other	ENSP00000346032	905.25	Annexin A2	IPI00418169	S
ATAD3A	Nucleus	YES	Metabolism	Metabolism: Other	ENSP00000311766	7.53267	ATPase family AAA domain-containing protein 3A	IPI00295992	M
ATP5A1	Mitochondria	YES	Metabolism	Nucleic acid metabolism	ENSP00000282050	764.27	ATP synthase subunit alpha, mitochondrial	IPI00440493	MSG
ATP5B	Mitochondria	YES	Metabolism	Nucleic acid metabolism	ENSP00000262030	650.405	ATP synthase subunit beta, mitochondrial	IPI00303476	SG
BAG2	Cytoplasm		Protein degradation	E3 ubiquitin ligase inhibitor	ENSP00000359727	29.6155	BAG family molecular chaperone regulator 2	IPI00000643	MS
BAG6	Nucleus		Protein degradation	ERAD substrate extraction	ENSP00000365131	3.46579	BCL2-associated athanogene 6	IPI00465128	M
C1QBP	Mitochondria	YES	Metabolism	Carbohydrate metabolism	ENSP00000225698	865.067	Complement component 1 Q subcomponent-binding protein	IPI00014230	MS
CALML5	Cytoplasm		Signal transduction	Calcium ion binding	ENSP00000369689	41.3908	Calmodulin-like protein 5	IPI00021536	S
CALR	ER		Protein folding	Lectin chaperone	ENSP00000320866	1418.86	Calreticulin	IPI00020599	M
CANX	ER	YES	Protein folding	Lectin chaperone	ENSP00000247461	296.133	Calnexin	IPI00020984	MSG
CCT4	Cytoplasm		Protein folding	Hsp60 family	ENSP00000377958	264.717	T-complex protein 1 subunit delta	IPI00302927	M
COPA	Golgi		Protein trafficking	COPI machinary	ENSP00000357048	54.248	Coatomer subunit alpha	IPI00295857	M
COPE	Golgi		Protein trafficking	COPI machinary	ENSP00000262812	68.5699	Coatomer subunit epsilon	IPI00465132	M
CSE1L	Nucleus		Miscellaneous	Apoptosis	ENSP00000262982	58.0031	Isoform 1 of Exportin-2	IPI00022744	M
DBT	Mitochondria		Metabolism	Amino acid metabolism	ENSP00000359151	12.2226	Lipoamide acyltransferase component of branched-chain alpha-keto acid dehydrogenase complex	IPI00003944	M
DDOST	ER	YES	Protein folding	N-glycoprotein processing	ENSP00000364188	82.0213	Dolichyl-diphosphooligosaccharide-protein glycosyltransferase	IPI00297084	M
DDX20	Nucleus		Protein synthesis	RNA processing	ENSP00000358716	2.32513	Probable ATP-dependent RNA helicase DDX20	IPI00005904	M
DERL1	ER	YES	Protein degradation	ERAD dislocation channel	ENSP00000259512	7.15283	Derlin-1	IPI00013271	M
DNAJA1	Cytoplasm		Protein folding	Hsp40 family	ENSP00000369127	62.5631	DnaJ homolog subfamily A member 1	IPI00012535	MS
DNAJA2	Cytoplasm		Protein folding	Hsp40 family	ENSP00000314030	28.1953	DnaJ homolog subfamily A member 2	IPI00032406	M
DNAJB11	Cytoplasm		Protein folding	Hsp40 family	ENSP00000265028	19.6209	DnaJ homolog subfamily B member 11, ERdj3	IPI00008454	M
EEF1A1	Cytoplasm		Protein synthesis	Translation factor	ENSP00000330054	2515.64	Elongation factor 1, alpha 1	IPI00396485	MG
EEF2	Cytoplasm		Protein synthesis	Translation factor	ENSP00000307940	784.94	Elongation factor 2	IPI00186290	MS
EIF4B	Cytoplasm		Protein synthesis	Translation factor	ENSP00000262056	66.6201	Eukaryotic translation initiation factor 4B	IPI00012079	G
ENO1	Cytoplasm		Metabolism	Carbohydrate metabolism	ENSP00000234590	3864.63	Alpha-enolase 1	IPI00465248	S
FABP5	Cytoplasm		Metabolism	Lipid metabolism	ENSP00000297258	523.789	Fatty acid-binding protein, epidermal	IPI00007797	S
FARSA	Cytoplasm		Protein synthesis	Aminoacetyl tRNA synthetase	ENSP00000320309	59.1654	Phenylalanyl-tRNA synthetase alpha chain	IPI00031820	MG
GABRR1	Plasma Membrane	YES	Ion channel	Ion channel	ENSP00000412673	0.068486	Gamma-aminobutyric-acid receptor rho-1 subunit	IPI00747264	MSG
GANAB	ER		Protein folding	N-glycoprotein processing	ENSP00000340466	186.248	Neutral alpha-glucosidase AB precursor	IPI00011454	MS
GAPDH	Cytoplasm		Metabolism	Carbohydrate metabolism	ENSP00000229239	6635.66	Glyceraldehyde-3-phosphate dehydrogenase	IPI00219018	S
GDI1	Cytoplasm		Protein trafficking	GDP dissociation inhibitor	ENSP00000394071	125.185	Rab GDP dissociation inhibitor alpha	IPI00010154	M
GSTP1	Cytoplasm		Metabolism	Lipid metabolism	ENSP00000381607	1052.84	Glutathione S-transferase P	IPI00219757	MS
H2AFV	Nucleus		DNA binding	Histone	ENSP00000308405	131.488	histone H2A.V	IPI00018278	M
HECTD3	Cytoplasm		Protein degradation	E3 ubiquitin ligase	ENSP00000361245	0.174853	E3 ubiquitin-protein ligase HECTD3	IPI00456642	MG
HIST1H4A	Nucleus		DNA binding	Histone	ENSP00000343282	641.943	Histone H4	IPI00453473	S
HSP90AB1	Cytoplasm		Protein folding	Hsp90 family	ENSP00000325875	1221.32	Heat shock protein 90kDa beta, cytosolic	IPI00414676	MG
HSP90B1	ER		Protein folding	Hsp90 family	ENSP00000299767	462.329	Endoplasmin, Grp94	IPI00027230	M
HSPA1A	Cytoplasm		Protein folding	Hsp70 family	ENSP00000364801	113.544	Heat shock 70 kDa protein 1A	IPI00304925	SG
HSPA5	ER		Protein folding	Hsp70 family	ENSP00000324173	597.009	Heat shock 70kDa protein 5, BiP	IPI00003362	SG
HSPA6	Cytoplasm		Protein folding	Hsp70 family	ENSP00000310219	26.9866	Heat shock 70 kDa protein 6	IPI00339269	SG
HSPA8	Cytoplasm		Protein folding	Hsp70 family	ENSP00000227378	1362.48	Heat shock 70kDa protein 8, HSC70	IPI00003865	SG
HSPB1	Cytoplasm		Protein folding	Small HSP family	ENSP00000248553	442.707	Heat-shock protein beta-1, Hsp27	IPI00025512	MS
HSPD1	Mitochondria		Protein folding	Hsp60 family	ENSP00000340019	1807.03	Heat shock 60kDa protein 1	IPI00784154	MS
HSPH1	Cytoplasm		Protein folding	Hsp105 family	ENSP00000318687	57.9421	Heat-shock 105 kDa protein 1	IPI00218993	M
HUWE1	Cytoplasm		Protein degradation	E3 ubiquitin ligase	ENSP00000262854	8.2403	E3 ubiquitin-protein ligase HUWE1	IPI00179298	M
HYOU1	ER		Protein folding	Hsp70 family	ENSP00000278752	73.8423	Hypoxia up-regulated protein 1, GRP170	IPI00922127	M
IGF2BP1	Cytoplasm	YES	Protein synthesis	mRNA binding protein	ENSP00000290341	34.1927	Insulin-like growth factor 2 mRNA-binding protein 1	IPI00008557	M
IMMT	Mitochondria	YES	Miscellaneous	Miscellaneous: Other	ENSP00000387262	85.5824	Isoform 1 of Mitochondrial inner membrane protein	IPI00009960	M
KCTD2	Plasma Membrane	YES	Ion channel	Ion channel	ENSP00000312814	0.370728	Potassium channel tetramerisation domain containing 2	IPI00440769	M
LGALS7	Cytoplasm		Miscellaneous	Apoptosis	ENSP00000313571	65.7589	Lectin, galactoside-binding, soluble, 7B	IPI00219221	S
LMAN1	ER	YES	Protein trafficking	ER Golgi transport	ENSP00000251047	107.821	ERGIC-53 protein	IPI00026530	M
LRRC59	ER	YES	Miscellaneous	Miscellaneous: Other	ENSP00000225972	85.2277	Leucine-rich repeat-containing protein 59	IPI00396321	M
MYH10	Cytoplasm		Cellular organization	Motor protein	ENSP00000269243	110.52	Myosin-10	IPI00397526	M
MYH9	Cytoplasm		Cellular organization	Motor protein	ENSP00000216181	1043.32	Myosin-9	IPI00019502	MS
MYO6	Cytoplasm		Cellular organization	Motor protein	ENSP00000358994	16.2867	Myosin VI	IPI00008455	M
NDUFS1	Mitochondria	YES	Metabolism	Energy production	ENSP00000233190	68.9236	NADH-ubiquinone oxidoreductase 75 kDa subunit	IPI00604664	M
NDUFV1	Mitochondria	YES	Metabolism	Energy production	ENSP00000322450	69.2111	NADH dehydrogenase [ubiquinone] flavoprotein 1	IPI00028520	M
NDUFV2	Mitochondria	YES	Metabolism	Energy production	ENSP00000327268	17.6176	NADH dehydrogenase [ubiquinone] flavoprotein 2	IPI00291328	M
NOMO1	Plasma Membrane	YES	Miscellaneous	Miscellaneous: Other	ENSP00000287667	2.35821	Nodal modulator 1 precursor	IPI00329352	M
P4HA1	ER		Protein folding	Folding enzyme	ENSP00000263556	9.79879	Prolyl 4-hydroxylase subunit alpha-1	IPI00009923	M
P4HB	ER		Protein folding	Folding enzyme	ENSP00000327801	322.365	Protein disulfide-isomerase, beta subunit, PDIA1	IPI00010796	M
PABPC4	Cytoplasm		Protein synthesis	RNA processing	ENSP00000361949	41.3626	Polyadenylate-binding protein 4	IPI00012726	M
PDIA6	ER	YES	Protein folding	Folding enzyme	ENSP00000272227	278.692	Protein disulfide-isomerase A6	IPI00299571	M
PKM2	Cytoplasm		Metabolism	Carbohydrate metabolism	ENSP00000320171	2184.04	Pyruvate kinase isozymes M2	IPI00220644	S
PPIA	Cytoplasm		Protein folding	Folding enzyme	ENSP00000419425	3389.26	Peptidylprolyl isomerase A (cyclophilin A)	IPI00419585	S
PSMD2	Cytoplasm		Protein degradation	Proteasome related	ENSP00000310129	47.8166	26S proteasome non-ATPase regulatory subunit 2	IPI00012268	MS
PTPLAD1	ER	YES	Signal transduction	Signal transduction: Other	ENSP00000261875	28.5031	Protein-tyrosine phosphatase-like A domain-containing protein 1	IPI00008998	M
RAD23B	Cytoplasm		Protein degradation	Proteasome related	ENSP00000350708	146.794	UV excision repair protein RAD23 homolog B	IPI00008223	M
RPL14	Cytoplasm		Protein synthesis	Ribosomal protein	ENSP00000345156	187.671	Ribosomal protein L14 variant	IPI00555744	S
RPL7P32	Cytoplasm		Protein synthesis	Ribosomal protein	N/A	N/A	60S ribosomal protein L7	IPI00030179	MS
RPN1	ER	YES	Protein folding	N-glycoprotein processing	ENSP00000296255	127.437	Dolichyl-diphosphooligosaccharide-protein glycosyltransferase subunit 1	IPI00025874	M
RPN2	ER	YES	Protein folding	N-glycoprotein processing	ENSP00000237530	136.736	Dolichyl-diphosphooligosaccharide-protein glycosyltransferase subunit 2	IPI00028635	M
RPS10	Cytoplasm		Protein synthesis	Ribosomal protein	ENSP00000347271	180.621	40S ribosomal protein S10	IPI00008438	MS
RPS24	Cytoplasm		Protein synthesis	Ribosomal protein	ENSP00000414321	146.152	40S ribosomal protein S24	IPI00029750	S
S100A7	Cytoplasm		Signal transduction	Calcium ion binding	ENSP00000357711	46.4254	S100 calcium binding protein A7	IPI00219806	M
S100A8	Cytoplasm		Signal transduction	Calcium ion binding	ENSP00000357721	900.148	S100 calcium binding protein A8	IPI00007047	S
S100A9	Cytoplasm		Signal transduction	Calcium ion binding	ENSP00000357727	2177.43	S100 calcium binding protein A9	IPI00027462	MS
SEC13	ER		Protein trafficking	COPII machinary	ENSP00000312122	26.2861	SEC13-related protein	IPI00375370	M
SEC16A	ER	YES	Protein trafficking	COPII machinary	ENSP00000325827	6.89452	SEC16 homolog A	IPI00641384	M
SERPINB3	Cytoplasm		Protein degradation	Protease inhibition	ENSP00000283752	14.0139	Serpin B3	IPI00022204	S
SERPINB4	Cytoplasm		Protein degradation	Protease inhibition	ENSP00000343445	8.20921	Serpin B4	IPI00010303	S
SERPINB5	Cytoplasm		Protein degradation	Protease inhibition	ENSP00000372221	40.4786	Serpin B5	IPI00783625	S
SFN	Cytoplasm		Signal transduction	Adapter protein	ENSP00000340989	295.716	14-3-3 protein sigma	IPI00013890	S
SKP1	Nucleus		DNA binding	Transcription factor	ENSP00000231487	93.2447	S-phase kinase-associated protein 1	IPI00172421	M
SLC25A3	Mitochondria	YES	Metabolism	Nucleic acid metabolism	ENSP00000228318	92.3779	Solute carrier family 25, member 3	IPI00215777	MG
SLC25A4	Mitochondria	YES	Metabolism	Nucleic acid metabolism	ENSP00000281456	217.284	Solute carrier family 25, member 4	IPI00022891	M
SLC25A5	Mitochondria	YES	Metabolism	Nucleic acid metabolism	ENSP00000360671	329.24	Solute carrier family 25, member 5	IPI00007188	MG
SLC25A6	Mitochondria	YES	Metabolism	Nucleic acid metabolism	ENSP00000370808	226.441	Solute carrier family 25, member 6	IPI00291467	MSG
SQSTM1	Cytoplasm		Protein degradation	Ubiquitin-related	ENSP00000374455	15.513	Sequestosome-1	IPI00179473	MSG
SUN2	Nucleus	YES	Cellular organization	Cellular organization: Other	ENSP00000216064	5.8437	Sad1/unc-84-like protein 2	IPI00295940	M
TCP1	Cytoplasm		Protein folding	Hsp60 family	ENSP00000317334	184.995	T-complex protein 1 subunit alpha	IPI00290566	M
TUBA1A	Cytoplasm		Cellular organization	Cytoskeleton	ENSP00000301071	690.294	Tubulin alpha-1A chain	IPI00180675	MG
TUBB	Cytoplasm		Cellular organization	Cytoskeleton	ENSP00000339001	410.193	Beta-tubulin, class I	IPI00645452	MSG
TUBB2A	Cytoplasm		Cellular organization	Cytoskeleton	ENSP00000369703	345.818	Tubulin beta-2A chain	IPI00013475	S
TUBB3	Cytoplasm		Cellular organization	Cytoskeleton	ENSP00000320295	169.949	Tubulin beta-3 chain	IPI00013683	MSG
UBB	Cytoplasm		Protein degradation	Ubiquitin-related	ENSP00000304697	274.815	Ubiquitin B	IPI00179330	MSG
UBR5	Cytoplasm		Protein degradation	E3 ubiquitin ligase	ENSP00000220959	1.32583	E3 ubiquitin-protein ligase EDD1	IPI00026320	MSG
UGGT1	ER		Protein folding	N-glycoprotein processing	ENSP00000259253	20.9003	UDP-glucose ceramide glucosyltransferase-like 1	IPI00024466	M
VCP	Cytoplasm		Protein degradation	ERAD substrate extraction	ENSP00000351777	464.105	Transitional endoplasmic reticulum ATPase	IPI00022774	MS
VDAC1	Mitochondria	YES	Ion channel	Ion channel	ENSP00000265333	471.863	Voltage-dependent anion-selective channel protein 1	IPI00216308	M
YWHAB	Cytoplasm		Signal transduction	Adapter protein	ENSP00000300161	405.787	14-3-3 protein beta/alpha	IPI00216318	S
YWHAZ	Cytoplasm		Signal transduction	Adapter protein	ENSP00000309503	1296.42	14-3-3 protein zeta/delta	IPI00021263	S
MS/MS methods: M, MudPIT; S, SoLC-MS/MS; G, GeLC-MS/MS
Protein Abundance data is from PaxDb: Protein Abundance Across Organisms (http://pax-db.org)
